# Supplementary material for: Setting research priorities to achieve long-term national road safety goals in Iran
Source: PubMed Central journal article supplement (PMC8974318; doi:10.7189/jogh.12.09002), 2022-04-02
Supplement: jogh-12-09002-s001.pdf [file jogh-12-09002-s001.pdf]

## Supplementary

Table S1. Characteristic of experts participated in the study

| <b>Experts field</b>                             | <b>Work experience (year)</b> | <b>Working sector</b>      | <b>Interests</b>                                                                           |
|--------------------------------------------------|-------------------------------|----------------------------|--------------------------------------------------------------------------------------------|
| Road Traffic Management                          | 32                            | Traffic Police             | Road Traffic Management                                                                    |
| Injury Prevention and Safety Promotion           | 29                            | University/ Faculty Member | Safety promotion, Injury prevention, Road Traffic Injury prevention                        |
| Strategic Management/ Traffic Management         | 33                            | Traffic Police             | Transportation, Strategic Management,                                                      |
| Civil engineering                                | 33                            | University/ Faculty Member | Road safety                                                                                |
| Health policy                                    | 7                             | University/ Faculty Member | Health policy, Health system research                                                      |
| Health in disaster and emergencies               | 26                            | University/ Faculty Member | Health in disaster, Injury                                                                 |
| Transportation engineering                       | 35                            | University/ Faculty Member | Traffic safety, Traffic operation and management, Traffic flow modeling                    |
| Transportation engineering                       | 10                            | University/ Faculty Member | Road traffic analysis, Road safety audit                                                   |
| Energy and sustainable development/ Architecture | 18                            | University/ Faculty Member | Sustainable development, Sustainable city, Intelligent transportation system, Benchmarking |
| Injury Epidemiology                              | 30                            | University/ Faculty Member | Road traffic injury epidemiology                                                           |
| Psychiatry                                       | 26                            | University/ Faculty Member | Traffic and mental health                                                                  |
| Pharmaceutical Economics and management          | 15                            | University/ Faculty Member | Road traffic economy                                                                       |
| Mechanic engineering                             | 9                             | University/ Faculty Member | Autonomous vehicles, Advanced driving Assistance System, Vehicle Braking system            |

| <b>Experts field</b>                                                                  | <b>Work experience (year)</b> | <b>Working sector</b>      | <b>Interests</b>                                                            |
|---------------------------------------------------------------------------------------|-------------------------------|----------------------------|-----------------------------------------------------------------------------|
| Biostatistics                                                                         | 15                            | University/ Faculty Member | Road Traffic accident                                                       |
| Criminal Law and Criminology / Social adjustment for road traffic accident prevention | 34                            | Traffic police             | Criminal Law and Criminology ,<br>Traffic culture                           |
| Health education and health promotion                                                 | 8                             | University/ Faculty Member | Lifestyle, Non-communicable disease prevention                              |
| Emergency medicine                                                                    | 12                            | University/ Faculty Member | Emergency,<br>Health in disaster                                            |
| Traffic / urban planning                                                              | 19                            | Traffic police             | Child pedestrian safety, Motorcyclists' safety                              |
| Aerospace engineering                                                                 | 8                             | University/ Faculty Member | Driving simulator,<br>Advanced driver-assistance systems,<br>Vehicle safety |
| Trauma biomechanics                                                                   | 9                             | University/ Faculty Member | Trauma biomechanics, Impact biomechanics,<br>Traumatic brain injury         |
| Health management                                                                     | 4                             | University/ Faculty Member | Traffic injury,<br>Road safety management                                   |
| Crisis strategic management                                                           | 30                            | University/ Faculty Member | Crisis and strategic management,<br>Traffic management,<br>Traffic culture  |
| Civil engineering                                                                     | 20                            | University/ Faculty Member | Civil Engineering,<br>Intelligent transportation system                     |
| Traffic management                                                                    | 30                            | Traffic police             | Traffic management                                                          |

Table S2. All 145 RQs for Road Traffic Safety in Iran

| Item Number | Proposed RQ*                                                                                                                                                                                                                     | Feasibility (Score) | Impact on health (Score) | Impact on economy (Score) | Capacity building (Score) | Equity (Score) | RPS+ (Score) | wRSP + (Score) | AEA § (Score) | Road safety pillar (Code) |
|-------------|----------------------------------------------------------------------------------------------------------------------------------------------------------------------------------------------------------------------------------|---------------------|--------------------------|---------------------------|---------------------------|----------------|--------------|----------------|---------------|---------------------------|
| 1           | Investigating the effects and strategies of developing intelligent systems to achieve safety goals in the country                                                                                                                | 66                  | 70                       | 65                        | 69                        | 57             | 65.4         | 55.8           | 19            | 1, 2                      |
| 2           | Exploring ways to achieve public participation in promoting traffic safety                                                                                                                                                       | 64                  | 70                       | 66                        | 63                        | 60             | 64.6         | 55.2           | 19            | 1, 4                      |
| 3           | The investigation of methods for utilizing the experience and knowledge of experts and educated individual in the field of traffic safety                                                                                        | 70                  | 65                       | 59                        | 68                        | 60             | 64.4         | 54.7           | 19            | 1                         |
| 4           | The study and compilation of significant RTC analysis programs by specialized crash analysis teams in conjunction with an in-depth examination of the crash scene in order to determine the causes of crashes and their severity | 70                  | 68                       | 57                        | 65                        | 56             | 63.2         | 53.7           | 17            | 1, 5                      |
| 5           | Study to assess and continuously improve the quality of RTCs-related health care services                                                                                                                                        | 66                  | 69                       | 60                        | 58                        | 63             | 63.2         | 53.9           | 17            | 5                         |
| 6           | Conducting pre and post intervention studies to ascertain the efficacy of road safety interventions                                                                                                                              | 72                  | 65                       | 66                        | 63                        | 49             | 63.0         | 53.7           | 17            | 1                         |
| 7           | Evaluation of low-cost methods for improving road safety                                                                                                                                                                         | 70                  | 67                       | 68                        | 52                        | 58             | 63.0         | 53.9           | 18            | 1                         |
| 8           | Examining the possibility of amending road traffic-related legislation in order to improve road traffic safety                                                                                                                   | 71                  | 67                       | 61                        | 58                        | 57             | 62.8         | 53.5           | 17            | 1                         |
| 9           | Reforming macro-level traffic safety policies                                                                                                                                                                                    | 66                  | 61                       | 57                        | 69                        | 57             | 62.0         | 51.9           | 17            | 1                         |

| Item Number | Proposed RQ*                                                                                                                                                                        | Feasibility (Score) | Impact on health (Score) | Impact on economy (Score) | Capacity building (Score) | Equity (Score) | RPS+ (Score) | wRSP + (Score) | AEA § (Score) | Road safety pillar (Code) |
|-------------|-------------------------------------------------------------------------------------------------------------------------------------------------------------------------------------|---------------------|--------------------------|---------------------------|---------------------------|----------------|--------------|----------------|---------------|---------------------------|
| 10          | Study of the role of enforcing police regulations using modern and intelligent tools promote road traffic safety                                                                    | 63                  | 64                       | 68                        | 58                        | 55             | 61.6         | 52.7           | 18            | 1                         |
| 11          | Study of reviewing and developing a comprehensive RTCs registration system and analyzing indicators                                                                                 | 70                  | 63                       | 57                        | 60                        | 57             | 61.4         | 49.1           | 16            | 1                         |
| 12          | Study of the challenges related to improving the safety of interurban and rural roads                                                                                               | 68                  | 62                       | 58                        | 64                        | 54             | 61.2         | 52.0           | 17            | 2                         |
| 13          | Preliminary feasibility studies for establishing a vehicle rating and reporting system (accreditation) with the assistance of vehicle insurance companies                           | 64                  | 65                       | 56                        | 57                        | 63             | 61.0         | 52.0           | 17            | 3                         |
| 14          | Study of the Lead Agency in road traffic crashes in Iran                                                                                                                            | 65                  | 66                       | 63                        | 57                        | 54             | 61.0         | 52.1           | 16            | 1                         |
| 15          | Reviewing the road traffic rules related to driving violations in order to promote road safety and driving culture                                                                  | 65                  | 60                       | 58                        | 64                        | 58             | 61.0         | 47.5           | 17            | 1, 4                      |
| 16          | What strategies are in place to develop continuous training of safe traffic behaviors for professional drivers (public transport drivers including buses, trucks, vans, and taxis)? | 60                  | 66                       | 61                        | 64                        | 53             | 60.8         | 51.9           | 16            | 1, 4                      |
| 17          | Study of mechanisms for boosting knowledge and industry exchange in the field of traffic safety                                                                                     | 68                  | 66                       | 58                        | 58                        | 54             | 60.8         | 42.4           | 17            | 1                         |
| 18          | Study the possibility of an intelligent system for detecting driver fatigue and drowsiness                                                                                          | 62                  | 64                       | 57                        | 60                        | 60             | 60.6         | 51.6           | 17            | 2, 4                      |
| 19          | Study of establishing a connection between national intelligent systems such as the meteorological system, the                                                                      | 65                  | 63                       | 61                        | 62                        | 52             | 60.6         | 51.6           | 15            | 2                         |

| Item Number | Proposed RQ*                                                                                                                                                                                                                            | Feasibility (Score) | Impact on health (Score) | Impact on economy (Score) | Capacity building (Score) | Equity (Score) | RPS+ (Score) | wRSP + (Score) | AEA § (Score) | Road safety pillar (Code) |
|-------------|-----------------------------------------------------------------------------------------------------------------------------------------------------------------------------------------------------------------------------------------|---------------------|--------------------------|---------------------------|---------------------------|----------------|--------------|----------------|---------------|---------------------------|
|             | police system, and the breakdown monitoring system on improving road traffic safety                                                                                                                                                     |                     |                          |                           |                           |                |              |                |               |                           |
| 20          | Methodological study the process of attracting, providing, and allocating financial resources for road traffic infrastructure development in order to achieve sustainable development in the field of road traffic safety               | 65                  | 70                       | 58                        | 59                        | 51             | 60.6         | 51.6           | 17            | 2                         |
| 21          | The study of the relationship between intelligent national systems such as meteorological, police, and crash monitoring systems, as well as their effect on improving road safety                                                       | 62                  | 62                       | 62                        | 59                        | 56             | 60.2         | 51.7           | 17            | 2                         |
| 22          | The study of methods for attracting, providing, and allocating financial resources for the creation and development of transportation infrastructure in order to achieve the road safety sustainability goals                           | 64                  | 55                       | 66                        | 55                        | 60             | 60.0         | 51.3           | 16            | 1, 2                      |
| 23          | The examination of operational strategies aimed at reducing the demand for intra-city travel                                                                                                                                            | 67                  | 64                       | 65                        | 55                        | 48             | 59.8         | 51.1           | 17            | 1, 2                      |
| 24          | Examination of effective methods for preventing dangerous pavement failures                                                                                                                                                             | 61                  | 63                       | 62                        | 54                        | 57             | 59.4         | 52.6           | 17            | 2                         |
| 25          | Economic analysis of the costs of road crashes caused by unsafe vehicles in comparison to the liberalization of high-safety vehicles                                                                                                    | 62                  | 63                       | 67                        | 53                        | 50             | 59.0         | 50.6           | 16            | 3                         |
| 26          | Study the possibility of psychological tests administered at the start of the certification process for all drivers, or the very least for professional drivers (buses, trucks, suburban taxis, and others), and repeated every 5 years | 66                  | 68                       | 53                        | 60                        | 48             | 59.0         | 50.1           | 16            | 4                         |
| 27          | Aggregation of data on road traffic collisions from all relevant organizations                                                                                                                                                          | 63                  | 65                       | 55                        | 59                        | 52             | 58.8         | 50.1           | 16            | 1                         |

| Item Number | Proposed RQ*                                                                                                                                                          | Feasibility (Score) | Impact on health (Score) | Impact on economy (Score) | Capacity building (Score) | Equity (Score) | RPS+ (Score) | wRSP + (Score) | AEA § (Score) | Road safety pillar (Code) |
|-------------|-----------------------------------------------------------------------------------------------------------------------------------------------------------------------|---------------------|--------------------------|---------------------------|---------------------------|----------------|--------------|----------------|---------------|---------------------------|
| 28          | Investigation of solutions designed to improve motorcycle safety                                                                                                      | 60                  | 63                       | 57                        | 53                        | 60             | 58.6         | 50.1           | 15            | 3                         |
| 29          | The examination of the challenges and solutions inherent in the development and effective operation of intelligent road traffic management systems                    | 64                  | 61                       | 58                        | 60                        | 50             | 58.6         | 49.9           | 15            | 1                         |
| 30          | The investigation of strategies for enticing the public to participate in promoting safe driving behaviors for various groups of road users                           | 60                  | 63                       | 57                        | 60                        | 52             | 58.4         | 49.8           | 16            | 1, 4                      |
| 31          | Examination of the performance of road safety audits during the road construction phase                                                                               | 61                  | 60                       | 61                        | 57                        | 53             | 58.4         | 49.9           | 17            | 2                         |
| 32          | The study of the roads attributable risk in road traffic collisions and related injuries                                                                              | 64                  | 62                       | 59                        | 54                        | 52             | 58.2         | 49.7           | 15            | 1                         |
| 33          | Control and revision of accident registration forms, as well as the elimination of existing deficiencies and database development strategies                          | 70                  | 65                       | 53                        | 63                        | 39             | 58.0         | 49.2           | 15            | 1                         |
| 34          | The investigation of strategies for improving motorcyclists' safety behavior concerning helmet use                                                                    | 63                  | 67                       | 50                        | 53                        | 57             | 58.0         | 49.3           | 16            | 1, 4                      |
| 35          | In collaboration with experts in the field of road safety, develop a comprehensive safety plan for the development of intelligent transportation technologies and ITS | 63                  | 63                       | 59                        | 58                        | 47             | 58.0         | 46.4           | 15            | 1                         |
| 36          | The effect of laws on high-risk drivers, particularly public transportation drivers, in terms of promoting road safety                                                | 59                  | 68                       | 57                        | 48                        | 57             | 57.8         | 49.5           | 16            | 1                         |
| 37          | The study of families with children's knowledge, attitudes, and behaviors regarding the use of child seats                                                            | 64                  | 69                       | 54                        | 52                        | 49             | 57.6         | 49.1           | 14            | 4                         |
| 38          | Examination of the treatment measures administered to injured patients (and deceased) in medical centers                                                              | 64                  | 66                       | 52                        | 51                        | 55             | 57.6         | 49.1           | 15            | 5                         |
| 39          | The study of the growth of green transportation in cities to promote traffic safety                                                                                   | 62                  | 65                       | 56                        | 56                        | 49             | 57.6         | 45.7           | 15            | 1, 2                      |

| Item Number | Proposed RQ*                                                                                                                                                           | Feasibility (Score) | Impact on health (Score) | Impact on economy (Score) | Capacity building (Score) | Equity (Score) | RPS+ (Score) | wRSP + (Score) | AEA § (Score) | Road safety pillar (Code) |
|-------------|------------------------------------------------------------------------------------------------------------------------------------------------------------------------|---------------------|--------------------------|---------------------------|---------------------------|----------------|--------------|----------------|---------------|---------------------------|
| 40          | The development and evaluation of in-vehicle interaction systems to reduce passive fatigue under consistent driving conditions                                         | 61                  | 67                       | 55                        | 54                        | 49             | 57.2         | 48.8           | 13            | 3                         |
| 41          | Assessment of the economic cost of road traffic crashes on a national scale                                                                                            | 67                  | 57                       | 59                        | 51                        | 51             | 57.0         | 48.6           | 14            | 1                         |
| 42          | Investigate the road safety challenges and solutions faced by elderly road users (pedestrians, passengers, and drivers)                                                | 65                  | 67                       | 46                        | 52                        | 55             | 57.0         | 46.1           | 14            | 4                         |
| 43          | A comprehensive study of strategies for enforcing traffic laws and effective interventions for traffic violations                                                      | 64                  | 54                       | 55                        | 57                        | 54             | 56.8         | 43.5           | 15            | 1, 4                      |
| 44          | A study of how to manage police deployment on the roads in response to the dynamic changes in accident hotspots                                                        | 63                  | 68                       | 54                        | 55                        | 44             | 56.8         | 48.2           | 14            | 1, 2                      |
| 45          | Investigate and support the growth and development of knowledge-based businesses and STARTUPS in the field of road safety                                              | 65                  | 56                       | 56                        | 59                        | 47             | 56.6         | 48.2           | 14            | 1, 2                      |
| 46          | The study of developing a national decision-support system for road safety, including a national registry system and a system for disseminating scientific information | 59                  | 58                       | 57                        | 57                        | 50             | 56.2         | 47.9           | 15            | 1                         |
| 47          | A study of vehicle attributable risks in road traffic collisions and related injuries                                                                                  | 64                  | 60                       | 57                        | 52                        | 48             | 56.2         | 47.9           | 14            | 1, 5                      |
| 48          | A study of the critical roles of transportation policymakers                                                                                                           | 59                  | 56                       | 54                        | 57                        | 54             | 56.0         | 47.7           | 15            | 1                         |
| 49          | Study the effect of educational content on a driver's safe behavior following the issuance of a driver's license                                                       | 63                  | 64                       | 47                        | 54                        | 52             | 56.0         | 47.5           | 14            | 4                         |
| 50          | Developing preventive monitoring systems for driver fatigue-related behaviors                                                                                          | 60                  | 65                       | 57                        | 51                        | 46             | 55.8         | 47.7           | 14            | 4                         |

| Item Number | Proposed RQ*                                                                                                                                          | Feasibility (Score) | Impact on health (Score) | Impact on economy (Score) | Capacity building (Score) | Equity (Score) | RPS+ (Score) | wRSP + (Score) | AEA § (Score) | Road safety pillar (Code) |
|-------------|-------------------------------------------------------------------------------------------------------------------------------------------------------|---------------------|--------------------------|---------------------------|---------------------------|----------------|--------------|----------------|---------------|---------------------------|
| 51          | Examination of the inadequacies in the executive guarantee for carrying out the responsibilities of related organizations in the field of road safety | 61                  | 57                       | 53                        | 56                        | 52             | 55.8         | 43.6           | 14            | 1                         |
| 52          | Cost-effectiveness analysis of interventions promoting safe driving behaviors among road users                                                        | 59                  | 56                       | 59                        | 53                        | 51             | 55.6         | 47.5<br>3      | 13            | 1, 4                      |
| 53          | A comparative study of a traffic police officer skill training course in comparison to leading countries in road safety                               | 66                  | 55                       | 49                        | 61                        | 46             | 55.4         | 49.5           | 13            | 1                         |
| 54          | Examining and standardizing the specialized training required of traffic police officers and the Association of Accident Experts                      | 69                  | 55                       | 42                        | 60                        | 50             | 55.2         | 46.5           | 14            | 1, 5                      |
| 55          | The investigation of strategies for the prevention of driving under the influence (DUI)                                                               | 62                  | 63                       | 54                        | 52                        | 45             | 55.2         | 47.1           | 13            | 1, 4                      |
| 56          | Analyze the evolution of the role of non-governmental organizations (NGOs) in promoting road safety                                                   | 58                  | 55                       | 51                        | 58                        | 52             | 54.8         | 46.6           | 13            | 1                         |
| 57          | Conduct research into the requirements for institutionalizing safe behaviors in the general public                                                    | 61                  | 59                       | 52                        | 56                        | 46             | 54.8         | 46.6           | 14            | 4                         |
| 58          | Study of the experiences with road safety knowledge over the last decade: Identifying strengths and weaknesses                                        | 67                  | 57                       | 52                        | 59                        | 39             | 54.8         | 46.5           | 13            | 1                         |
| 59          | The study of strategies for decommissioning worn-out cars that consume a high level of fossil fuels and emit pollution based on a three-step process  | 55                  | 60                       | 58                        | 53                        | 48             | 54.8         | 36.4           | 13            | 3                         |
| 60          | Investigating the potential for renewable energy to be used in electric and hybrid vehicles                                                           | 57                  | 58                       | 56                        | 55                        | 48             | 54.8         | 52.2           | 13            | 3                         |
| 61          | Standards that will be required in the future to accomplish the goals associated with agents of safety vehicles and roads                             | 58                  | 57                       | 56                        | 55                        | 47             | 54.6         | 46.6           | 14            | 1, 4                      |



| Item Number | Proposed RQ*                                                                                                                                                                 | Feasibility (Score) | Impact on health (Score) | Impact on economy (Score) | Capacity building (Score) | Equity (Score) | RPS+ (Score) | wRSP + (Score) | AEA § (Score) | Road safety pillar (Code) |
|-------------|------------------------------------------------------------------------------------------------------------------------------------------------------------------------------|---------------------|--------------------------|---------------------------|---------------------------|----------------|--------------|----------------|---------------|---------------------------|
| 62          | A comparative study of methods for promoting and enforcing safe driving behaviors among road users                                                                           | 58                  | 58                       | 52                        | 54                        | 51             | 54.6         | 45.4           | 12            | 4                         |
| 63          | Investigate the feasibility of developing and communicating comprehensive road traffic laws in collaboration with stakeholders                                               | 59                  | 61                       | 50                        | 55                        | 47             | 54.4         | 37.6           | 13            | 1                         |
| 64          | The study of the difficulties faced by disabled road users and the development of a solution to improve road safety                                                          | 63                  | 61                       | 45                        | 50                        | 53             | 54.4         | 44.7           | 13            | 4                         |
| 65          | Study the role of the government and policymakers in achieving the goal of reducing road traffic fatalities by 10% annually                                                  | 56                  | 60                       | 56                        | 51                        | 48             | 54.2         | 46.3           | 14            | 1, 5                      |
| 66          | The study of strategies for enhancing vehicle and road safety in the face of sanctions and the people's and government's economic conditions                                 | 59                  | 57                       | 56                        | 54                        | 45             | 54.2         | 46.2           | 13            | 1, 4                      |
| 67          | Investigate emerging technologies in the field of road safety and develop strategies for implementing them in Iran                                                           | 57                  | 58                       | 57                        | 56                        | 43             | 54.2         | 46.3           | 12            | 1, 2                      |
| 68          | The study of the difficulties associated with driver safety training programs and the formulation of recommendations for enhancing driver safety behavior                    | 61                  | 56                       | 50                        | 56                        | 48             | 54.2         | 46.1           | 13            | 4                         |
| 69          | Examination of strategies for effectively enforcing the legal provisions governing traffic violations, particularly those governing how the proceeds of violations are spent | 57                  | 52                       | 59                        | 50                        | 53             | 54.2         | 46.9           | 14            | 1, 4                      |
| 70          | Examining strategies for promoting national broadcasting's role in promoting road safety                                                                                     | 65                  | 57                       | 48                        | 48                        | 52             | 54.0         | 48.4           | 14            | 1                         |
| 71          | Examine the difficulties and solutions associated with the issuance of a driver's license                                                                                    | 62                  | 58                       | 50                        | 52                        | 47             | 53.8         | 45.7           | 13            | 1                         |
| 72          | Investigation of strategies for reducing motorcycle trips and establishing the types and specifications of motorcycles that may be used in traffic                           | 56                  | 64                       | 51                        | 45                        | 52             | 53.6         | 45.8           | 12            | 1, 4                      |

| Item Number | Proposed RQ*                                                                                                                                                    | Feasibility (Score) | Impact on health (Score) | Impact on economy (Score) | Capacity building (Score) | Equity (Score) | RPS+ (Score) | wRSP + (Score) | AEA § (Score) | Road safety pillar (Code) |
|-------------|-----------------------------------------------------------------------------------------------------------------------------------------------------------------|---------------------|--------------------------|---------------------------|---------------------------|----------------|--------------|----------------|---------------|---------------------------|
| 73          | Assessment of the cost-benefit ratio of road safety interventions                                                                                               | 64                  | 48                       | 65                        | 44                        | 47             | 53.6         | 45.9           | 13            | 1                         |
| 74          | The study of the factors that contribute to lawlessness in Iranian society, particularly while driving                                                          | 59                  | 62                       | 52                        | 49                        | 46             | 53.6         | 45.7           | 13            | 1, 4                      |
| 75          | Study the effect of a lack of appropriately trained trauma medical personnel on the road traffic accident fatality rate                                         | 56                  | 60                       | 52                        | 52                        | 48             | 53.6         | 45.7           | 14            | 1, 5                      |
| 76          | Evaluation of various strategies for addressing driver fatigue                                                                                                  | 56                  | 62                       | 52                        | 53                        | 45             | 53.6         | 45.7           | 14            | 4                         |
| 77          | Study the effectiveness of education for children and adolescents between pre-school and high school in promoting safe road user behavior                       | 60                  | 59                       | 46                        | 53                        | 50             | 53.6         | 46.8           | 15            | 4                         |
| 78          | Study of determining the level of recognition of high-risk situations in drivers                                                                                | 60                  | 65                       | 51                        | 48                        | 43             | 53.4         | 46.3           | 13            | 4                         |
| 79          | Study the effect of simulator training on the behaviors of novice drivers                                                                                       | 66                  | 55                       | 49                        | 54                        | 42             | 53.2         | 45.1           | 13            | 4                         |
| 80          | Study local approaches that are both effective and feasible for reducing traffic accidents in the country                                                       | 60                  | 60                       | 53                        | 47                        | 46             | 53.2         | 45.4           | 13            | 1                         |
| 81          | Examination of the evolution of smart-green transportation infrastructure                                                                                       | 58                  | 55                       | 54                        | 51                        | 48             | 53.2         | 42.2           | 13            | 2                         |
| 82          | Study the development of an intelligent detection system and an obstacle warning system for vehicles                                                            | 62                  | 64                       | 49                        | 49                        | 41             | 53.0         | 45.1           | 13            | 3                         |
| 83          | Study the promotion of comprehensive data collection sources for road traffic accidents and development of a validation system for verifying the collected data | 63                  | 57                       | 47                        | 54                        | 44             | 53.0         | 44.9           | 11            | 1                         |
| 84          | Study of establishing national and provincial research networks in collaboration with stakeholders in order to reduce traffic accidents                         | 55                  | 58                       | 49                        | 56                        | 47             | 53.0         | 45.1           | 12            | 1                         |

| Item Number | Proposed RQ*                                                                                                                                    | Feasibility (Score) | Impact on health (Score) | Impact on economy (Score) | Capacity building (Score) | Equity (Score) | RPS+ (Score) | wRSP + (Score) | AEA § (Score) | Road safety pillar (Code) |
|-------------|-------------------------------------------------------------------------------------------------------------------------------------------------|---------------------|--------------------------|---------------------------|---------------------------|----------------|--------------|----------------|---------------|---------------------------|
| 85          | The examination of the effect of an individual's or society's economy on reducing road traffic injuries through the provision of safer vehicles | 52                  | 58                       | 57                        | 49                        | 49             | 53.0         | 45.4           | 11            | 3                         |
| 86          | Examine economic factors affecting road traffic injuries and fatalities                                                                         | 54                  | 51                       | 58                        | 48                        | 54             | 53.0         | 48.3           | 13            | 1                         |
| 87          | Study on determining the utilization of intelligent systems in controlling seat belts worn by intercity bus passengers                          | 65                  | 65                       | 47                        | 45                        | 43             | 53.0         | 48.4           | 12            | 4                         |
| 88          | Study the effect of using a simulator driving system in driving training centers                                                                | 65                  | 57                       | 51                        | 52                        | 39             | 52.8         | 44.8           | 13            | 4                         |
| 89          | Study implementation of a road safety performance management system through the use of a GIS online system                                      | 62                  | 62                       | 48                        | 50                        | 41             | 52.6         | 41.2           | 13            | 2                         |
| 90          | Study the role and effectiveness of the Road Safety Commission and the Supreme Council for Traffic Coordination                                 | 61                  | 54                       | 49                        | 54                        | 44             | 52.4         | 44.5           | 13            | 1                         |
| 91          | Examining the effects of dominant law enforcement by the traffic police on motorcyclists' helmet wearing behavior                               | 57                  | 58                       | 51                        | 47                        | 48             | 52.2         | 44.5           | 11            | 1, 4                      |
| 92          | Euro NCAP assessment of a vehicle's passive safety                                                                                              | 59                  | 58                       | 52                        | 48                        | 44             | 52.2         | 44.5           | 14            | 3                         |
| 93          | Investigation of strategies for increasing motorcycle riders' visibility                                                                        | 59                  | 62                       | 49                        | 46                        | 45             | 52.2         | 44.5           | 12            | 4                         |
| 94          | Study the development of an integrated traffic culture system to enhance road safety                                                            | 59                  | 56                       | 50                        | 48                        | 47             | 52.0         | 44.3<br>1      | 12            | 4                         |
| 95          | Predicting the effect of income and wealth inequality on the type and quality of services available in road traffic                             | 53                  | 57                       | 54                        | 47                        | 49             | 52.0         | 44.5           | 13            | 1                         |
| 96          | Study the effect of education, campaigning, marketing, and culture-building interventions on improving road safety                              | 62                  | 55                       | 47                        | 49                        | 47             | 52.0         | 45.8           | 12            | 1                         |

| Item Number | Proposed RQ*                                                                                                                            | Feasibility (Score) | Impact on health (Score) | Impact on economy (Score) | Capacity building (Score) | Equity (Score) | RPS+ (Score) | wRSP + (Score) | AEA § (Score) | Road safety pillar (Code) |
|-------------|-----------------------------------------------------------------------------------------------------------------------------------------|---------------------|--------------------------|---------------------------|---------------------------|----------------|--------------|----------------|---------------|---------------------------|
| 97          | Establishing a national vision for road safety for the next two decades and developing strategies for achieving related goals           | 54                  | 58                       | 55                        | 52                        | 40             | 51.8         | 44.3           | 12            | 1                         |
| 98          | The study of the difficulties associated with organizations' parallel activities regarding traffic safety culture                       | 58                  | 49                       | 54                        | 52                        | 45             | 51.6         | 43.9           | 12            | 1, 4                      |
| 99          | Examination of strategies for achieving the annual reduction target of 10%                                                              | 44                  | 58                       | 58                        | 48                        | 49             | 51.4         | 44.2           | 13            | 1                         |
| 100         | A study of financial incentives for drivers and pedestrians to improve their safety behaviors                                           | 58                  | 52                       | 57                        | 46                        | 44             | 51.4         | 43.9           | 11            | 4                         |
| 101         | Study the economic impact on driving cultures                                                                                           | 54                  | 54                       | 57                        | 45                        | 47             | 51.4         | 44.1           | 11            | 1, 4                      |
| 102         | Study the effect of difficult service conditions on the efficiency of traffic police officers                                           | 59                  | 53                       | 47                        | 52                        | 46             | 51.4         | 46.9           | 11            | 1                         |
| 103         | Examining the effect of traffic sign placement on accident-prone axes of road traffic and determining their role in accident occurrence | 63                  | 63                       | 52                        | 40                        | 38             | 51.2         | 43.7           | 12            | 1                         |
| 104         | Investigate strategies for increasing consumer demand for safer vehicles                                                                | 51                  | 53                       | 51                        | 52                        | 49             | 51.2         | 43.7           | 14            | 1, 3                      |
| 105         | Examine the effects of local training programs on improving road safety behavior with the cooperation of all social capacities          | 50                  | 57                       | 46                        | 53                        | 49             | 51.0         | 43.4           | 14            | 4                         |
| 106         | The investigation of long-term strategies for avoiding or mitigating the effects of change management in government                     | 54                  | 55                       | 51                        | 50                        | 45             | 51.0         | 45.4           | 11            | 1                         |
| 107         | Study the development of intelligent in-vehicle systems to enhance road safety in the short term                                        | 48                  | 56                       | 55                        | 54                        | 40             | 50.6         | 43.3           | 13            | 3                         |
| 108         | Developing and evaluating systems for modifying and improving the inactive sitting position of the driver in                            | 54                  | 59                       | 50                        | 47                        | 41             | 50.2         | 42.8           | 10            | 3                         |

| Item Number | Proposed RQ*                                                                                                                                                 | Feasibility (Score) | Impact on health (Score) | Impact on economy (Score) | Capacity building (Score) | Equity (Score) | RPS+ (Score) | wRSP + (Score) | AEA § (Score) | Road safety pillar (Code) |
|-------------|--------------------------------------------------------------------------------------------------------------------------------------------------------------|---------------------|--------------------------|---------------------------|---------------------------|----------------|--------------|----------------|---------------|---------------------------|
|             | order to alleviate physical and mental fatigue                                                                                                               |                     |                          |                           |                           |                |              |                |               |                           |
| 109         | Examining strategies for enhancing national technical expertise in the field of road safety                                                                  | 54                  | 51                       | 47                        | 54                        | 44             | 50.0         | 42.5           | 13            | 1                         |
| 110         | Examination of the psychological service requirements at the scene of a traffic accident                                                                     | 54                  | 56                       | 42                        | 51                        | 46             | 49.8         | 42.3           | 13            | 5                         |
| 111         | The study of the factors that contribute to road users' decreased risk perception                                                                            | 58                  | 60                       | 47                        | 46                        | 38             | 49.8         | 46.5           | 11            | 4                         |
| 112         | Comparing the rate of road traffic collisions between disabled and non-disabled drivers and proposing a preventive measure                                   | 56                  | 51                       | 47                        | 43                        | 49             | 49.2         | 41.9           | 11            | 4, 5                      |
| 113         | Investigate the long-term psychiatric needs of injured patients and propose a solution                                                                       | 59                  | 58                       | 40                        | 43                        | 46             | 49.2         | 41.7           | 11            | 5                         |
| 114         | Study the development of a systematic process for establishing a car tax system that is based on the technical characteristics of the vehicle                | 54                  | 47                       | 57                        | 41                        | 47             | 49.2         | 41.2           | 10            | 1, 3                      |
| 115         | Examine the standardization of advertisement boards on the outskirts of suburban thoroughfares to minimize driver distraction                                | 65                  | 58                       | 49                        | 39                        | 34             | 49.0         | 41.7           | 10            | 4                         |
| 116         | Study the factors that contribute to the lower quality of some domestically produced vehicles and the development of a solution for enhancing vehicle safety | 54                  | 55                       | 51                        | 40                        | 45             | 49.0         | 41.9           | 11            | 3                         |
| 117         | Identifying the short- and long-term consequences of road traffic accidents and their outcomes, as well as the most appropriate management solutions         | 53                  | 54                       | 51                        | 48                        | 39             | 49.0         | 41.8           | 10            | 1, 5                      |
| 118         | Examination of strategies for incorporating road safety components into all national programs and policies                                                   | 50                  | 54                       | 50                        | 50                        | 40             | 48.8         | 41.7           | 12            | 1                         |

| Item Number | Proposed RQ*                                                                                                                         | Feasibility (Score) | Impact on health (Score) | Impact on economy (Score) | Capacity building (Score) | Equity (Score) | RPS+ (Score) | wRSP + (Score) | AEA § (Score) | Road safety pillar (Code) |
|-------------|--------------------------------------------------------------------------------------------------------------------------------------|---------------------|--------------------------|---------------------------|---------------------------|----------------|--------------|----------------|---------------|---------------------------|
| 119         | Study the effect of government and budget change management on the optimal use of forgoing roadside strategies                       | 51                  | 54                       | 53                        | 46                        | 39             | 48.6         | 41.6           | 13            | 1, 2                      |
| 120         | What are the direct and indirect effects on road traffic injuries of social events such as the COVID-19 pandemic and global warming? | 53                  | 52                       | 50                        | 46                        | 42             | 48.6         | 41.5           | 10            | 1, 5                      |
| 121         | Study the effect of social determinants on drivers' risk perception                                                                  | 61                  | 59                       | 41                        | 41                        | 41             | 48.6         | 41.1           | 11            | 4                         |
| 122         | Study the development of Electronic Stability Program (ESP) technology for vehicle production                                        | 56                  | 60                       | 44                        | 40                        | 42             | 48.4         | 41.3           | 14            | 3                         |
| 123         | Study the development of parking and rest areas following road safety standards                                                      | 54                  | 53                       | 47                        | 46                        | 42             | 48.4         | 41.2           | 13            | 2                         |
| 124         | Study road brightness intensity of intercity roads and establishing an online GIS registration system                                | 53                  | 56                       | 51                        | 44                        | 37             | 48.2         | 40.1           | 9             | 2                         |
| 125         | Investigate the effect of economic determinants on vehicle drivers' risk perception                                                  | 52                  | 51                       | 52                        | 43                        | 42             | 48.0         | 37.7           | 10            | 4                         |
| 126         | Investigate the public's knowledge, attitude, and behavior regarding vehicle safety                                                  | 52                  | 58                       | 47                        | 42                        | 39             | 47.6         | 40.6           | 11            | 4                         |
| 127         | Developing the national Road Safety Performance (RSP)                                                                                | 54                  | 49                       | 45                        | 45                        | 45             | 47.6         | 40.5<br>2      | 11            | 1, 2                      |
| 128         | The study of drivers' knowledge, attitudes, and practices regarding child safety seats                                               | 52                  | 58                       | 46                        | 42                        | 37             | 47.0         | 40.1           | 11            | 4                         |
| 129         | The study of strategies for increasing motorcycle riders' motivation to wear high-visibility clothing                                | 56                  | 60                       | 40                        | 40                        | 37             | 46.6         | 39.6           | 10            | 4                         |
| 130         | Investigate strategies for utilizing a family physician to help prevent road traffic accidents and injuries                          | 46                  | 51                       | 41                        | 49                        | 44             | 46.2         | 39.3           | 10            | 1, 5                      |

| Item Number | Proposed RQ*                                                                                                        | Feasibility (Score) | Impact on health (Score) | Impact on economy (Score) | Capacity building (Score) | Equity (Score) | RPS+ (Score) | wRSP + (Score) | AEA § (Score) | Road safety pillar (Code) |
|-------------|---------------------------------------------------------------------------------------------------------------------|---------------------|--------------------------|---------------------------|---------------------------|----------------|--------------|----------------|---------------|---------------------------|
| 131         | Determining the most effective educational and media interventions for drivers to internalize road safety behaviors | 49                  | 52                       | 41                        | 50                        | 39             | 46.2         | 39.2           | 10            | 4                         |
| 132         | Calculation of the coefficients of correction for national accidents                                                | 52                  | 52                       | 42                        | 45                        | 38             | 45.8         | 38.9           | 9             | 1                         |
| 133         | The study of drivers' knowledge, attitudes, and practices regarding passenger safety                                | 55                  | 54                       | 40                        | 44                        | 35             | 45.6         | 38.7           | 10            | 4                         |
| 134         | Establishing the law enforcement officer's role in pedestrian road safety behavior                                  | 52                  | 54                       | 42                        | 44                        | 32             | 44.8         | 38.1           | 8             | 1                         |
| 135         | Study the definition and criterion for road traffic fatalities                                                      | 55                  | 43                       | 38                        | 44                        | 43             | 44.6         | 45.5           | 9             | 1, 5                      |
| 136         | Conduct a risk assessment of related organizations' exposure to human error                                         | 45                  | 46                       | 47                        | 46                        | 37             | 44.2         | 37.7           | 10            | 1, 4                      |
| 137         | The investigation of strategies for establishing organizational coordination among stakeholders in road safety      | 51                  | 46                       | 43                        | 42                        | 39             | 44.2         | 44.2           | 9             | 1                         |
| 138         | Investigate solutions for enhancing road safety standards from the community's perspective                          | 48                  | 45                       | 43                        | 44                        | 38             | 43.6         | 37.1           | 8             | 1                         |
| 139         | Study the road safety requirements for target groups.                                                               | 46                  | 46                       | 40                        | 37                        | 47             | 43.2         | 36.8           | 10            | 1, 4                      |
| 140         | Investigate the belief characteristics that influence drivers' risk perception of accidents                         | 51                  | 50                       | 40                        | 39                        | 34             | 42.8         | 31.2           | 7             | 4                         |
| 141         | Evaluate the effectiveness of displacement and camouflage strategies for speed camera installation                  | 58                  | 44                       | 44                        | 38                        | 30             | 42.8         | 36.4           | 9             | 1, 2                      |
| 142         | Examining the causes of fatigue and the risks associated with EMS personnel                                         | 49                  | 52                       | 34                        | 38                        | 36             | 41.8         | 35.5           | 9             | 5                         |

| Item Number | Proposed RQ*                                                                                         | Feasibility (Score) | Impact on health (Score) | Impact on economy (Score) | Capacity building (Score) | Equity (Score) | RPS+ (Score) | wRSP † (Score) | AEA § (Score) | Road safety pillar (Code) |
|-------------|------------------------------------------------------------------------------------------------------|---------------------|--------------------------|---------------------------|---------------------------|----------------|--------------|----------------|---------------|---------------------------|
| 143         | Evaluating the cost-effectiveness of developing a national NCAP for safe vehicles                    | 41                  | 41                       | 38                        | 38                        | 33             | 38.2         | 32.6           | 7             | 3                         |
| 144         | Study the effect of the COVID-19 epidemic on aggressive driving                                      | 45                  | 44                       | 35                        | 35                        | 30             | 37.8         | 32.1           | 5             | 4                         |
| 145         | Investigate the effect of adopted policies in transportation and traffic policies on risk perception | 41                  | 39                       | 37                        | 36                        | 30             | 36.6         | 45.5           | 6             | 1, 4                      |

†RPS –Research Priority Score; †wRPS – Weighted RPS; §AEA – Average Expert Agreement
